# Supplementary material for: Silencing of a Pectin Acetylesterase (PAE) Gene Highly Expressed in Tobacco Pistils Negatively Affects Pollen Tube Growth
Source: MDPI journal article supplement (doi:10.3390/plants12020329), 2023-01-10
Supplement: s1 [file s1]

**Table S1. Oligonucleotides used for PCR amplifications, gene cloning and expression analyses.** Small letters represent attB sites. Grey boxes mark the start and stop codons of NtPAE1. Letters in bold and underlined are the Kozak consensus sequence.

| <b>Primer name</b> | <b>Primer sequence (5'-3')</b>                    |
|--------------------|---------------------------------------------------|
| PAE-attB1          | agcaggcttc <b><u>accATGG</u></b> AGAAAGTGATGGATTG |
| PAE-attB2          | gaaagctgggtcCTACTGGCAAAATTTGCCAC                  |
| Ri-PAE-attB2       | gaaagctgggtcAGTGGTGTGCAAATATGTCTTGC               |
| BP1                | GGGGACAAGTTTGTACAAAAAGCAGGCTTC                    |
| BP2                | GGGGACCACTTTGTACAAGAAAGCTGGGTC                    |
| RT-qPCR PAE-Fw     | AGGAGGGTTGGGTGCAATCATACA                          |
| RT-qPCR PAE-Rv     | GCAGATCCGTGCAAAGCAACAAC                           |
| GAPDH - Fw         | GCATCTTTGATGCCAAGGCTGGAA                          |
| GAPDH - Rv         | TCGAGTGCTGTAGCCCATTTCGTT                          |
| Actin - Fw         | AGATGATGCTCCAAGGGCTGTGTT                          |
| Actin - Rv         | CCATGCCAACCATCACACCAGT                            |
