# Supplementary material for: Silencing of a Pectin Acetylesterase (PAE) Gene Highly Expressed in Tobacco Pistils Negatively Affects Pollen Tube Growth
Source: Plants (Basel). 2023 Jan 10;12(2):329. doi: 10.3390/plants12020329 (PMC9864977; doi:10.3390/plants12020329)
Supplement: Supplementary file 1 [file plants-12-00329-s001.zip]

Archive with 4 entries (4 files):
- Supplementary Figures.pdf
- Table S1 - primer descriptions.pdf
- Table S2 - Tobacco PAE family analysis.xlsx
- Table S3 - PAE family expression data.xlsx
