# Supplementary material for: Silencing of a Pectin Acetylesterase (PAE) Gene Highly Expressed in Tobacco Pistils Negatively Affects Pollen Tube Growth
Source: Plants (Basel). 2023 Jan 10;12(2):329. doi: 10.3390/plants12020329 (PMC9864977; doi:10.3390/plants12020329)
Supplement: Supplementary file 1 [file plants-12-00329-s001.zip › Table S2 - Tobacco PAE family analysis.xlsx]

## Sheet: General Information
		Position in Nitab-v4.5 Chromosomes				Position in Nitab-v4.5 Scaffolds
Locus	Gene	Chromosome	Start	End	Strand	Scaffold	Start	End	Strand	SignalP6 Prediction	DeepLoc 2.0 Prediction	PAE Domain (CD-Search)	Conserved Catalytic Triad
Nitab4.5_0002799g0050	NtPAE2	Nt01	100207592	100215107	+	Nitab4.5_0002799	334206	341721	+	Other	Cytoplasm|Extracellular	Complete	Yes
Nitab4.5_0001842g0130	NtPAE3	Nt04	58009571	58022568	-	Nitab4.5_0001842	449932	462929	-	Signal Peptide	Extracellular	Complete	Yes
Nitab4.5_0000349g0240	NtPAE4	Nt05	9892074	9907349	-	Nitab4.5_0000349	756962	772237	+	Other	Endoplasmic reticulum|Golgi apparatus	Complete	Yes
Nitab4.5_0000541g0090	NtPAE5	Nt07	21505328	21510497	-	Nitab4.5_0000541	655175	660344	+	Signal Peptide	Extracellular	Complete	Yes
Nitab4.5_0002660g0050	NtPAE6	Nt08	84096284	84125544	+	Nitab4.5_0002660	304145	333405	+	Other	Cytoplasm|Extracellular	Complete	Yes
Nitab4.5_0000081g0180	NtPAE7	Nt09	62770808	62775425	+	Nitab4.5_0000081	982763	987380	+	Signal Peptide	Extracellular	Complete	Yes
Nitab4.5_0003511g0020	NtPAE8	Nt19	125479149	125484285	+	Nitab4.5_0003511	71643	76779	-	Other	Extracellular	Complete	Yes
Nitab4.5_0000285g0040	NtPAE9	Nt21	30425963	30430174	+	Nitab4.5_0000285	571404	575615	+	Signal Peptide	Extracellular	Complete	Yes
Nitab4.5_0000623g0070	NtPAE10	Nt23	67192361	67195211	+	Nitab4.5_0000623	261352	264202	+	Other	Extracellular	Complete	Yes
Nitab4.5_0000623g0110	NtPAE11	Nt23	67563087	67567926	+	Nitab4.5_0000623	632078	636917	+	Signal Peptide	Extracellular|Lysosome/Vacuole	Complete	No
Nitab4.5_0000063g0270	NtPAE12	Nt24	19873942	19877182	+	Nitab4.5_0000063	1203206	1206446	+	Other	Extracellular	Complete	Yes
Nitab4.5_0000063g0300	NtPAE1	Nt24	20183517	20186163	-	Nitab4.5_0000063	1512781	1515427	-	Signal Peptide	Extracellular	Complete	Yes
Nitab4.5_0000063g0340	NtPAE13	Nt24	20444589	20449119	-	Nitab4.5_0000063	1773853	1778383	-	Signal Peptide	Extracellular	Complete	Yes
Nitab4.5_0001911g0040	NtPAE14	Nt24	30628180	30634573	+	Nitab4.5_0001911	232727	239120	+	Other	Endoplasmic reticulum|Golgi apparatus	Complete	Yes
Nitab4.5_0001081g0010	NtPAE15					Nitab4.5_0001081	168345	173041	+	Signal Peptide	Extracellular	Complete	Yes
Nitab4.5_0001132g0010	NtPAE16					Nitab4.5_0001132	81100	85743	-	Other	Extracellular	Complete	Yes
Nitab4.5_0001289g0100	NtPAE17					Nitab4.5_0001289	240692	244552	+	Signal Peptide	Extracellular	Complete	Yes
Nitab4.5_0001351g0060	NtPAE18					Nitab4.5_0001351	188794	192656	-	Other	Cytoplasm	Complete	No
Nitab4.5_0002697g0010	NtPAE19					Nitab4.5_0002697	176075	184632	+	Other	Cytoplasm|Extracellular	Complete	Yes
Nitab4.5_0002697g0050	NtPAE20					Nitab4.5_0002697	243432	245931	+	Other	Extracellular	Complete	Yes
Nitab4.5_0002697g0070	NtPAE21					Nitab4.5_0002697	300589	305541	-	Signal Peptide	Extracellular	Complete	Yes
Nitab4.5_0002913g0030	NtPAE22					Nitab4.5_0002913	317410	321668	+	Signal Peptide	Extracellular	Complete	Yes
Nitab4.5_0003422g0020	NtPAE23					Nitab4.5_0003422	102275	104651	+	Signal Peptide	Extracellular	Complete	Yes
Nitab4.5_0005845g0030	NtPAE24					Nitab4.5_0005845	93792	102157	-	Signal Peptide	Extracellular	Complete	Yes
Nitab4.5_0006127g0010	NtPAE25					Nitab4.5_0006127	10699	13159	-	Signal Peptide	Extracellular|Lysosome/Vacuole	Complete	Yes
Nitab4.5_0006546g0010	NtPAE26					Nitab4.5_0006546	140975	143113	+	Signal Peptide	Extracellular	Complete	Yes
Nitab4.5_0007008g0030	NtPAE27					Nitab4.5_0007008	3079	5195	+	Other	Cytoplasm	Complete	Yes
Nitab4.5_0008163g0010	NtPAE28					Nitab4.5_0008163	13102	15140	+	Other	Extracellular	Complete	Yes
Nitab4.5_0014203g0010	NtPAE29					Nitab4.5_0014203	14128	16717	-	Other	Extracellular	Complete	Yes
Nitab4.5_0027059g0010	NtPAE30					Nitab4.5_0027059	3049	5392	-	Other	Extracellular	Complete	Yes

## Sheet: CD-Search Output
#Batch CD-search tool	NIH/NLM/NCBI
#cdsid	QM3-qcdsearch-7F21EF6EEB5B5AB-39060BBF1F4698E0
#datatype	hitsConcise Results
#status	0
#Start time	2022-08-24T09:05:34	Run time	0:00:00:26
#status	success
Query	Hit type	PSSM-ID	From	To	E-Value	Bitscore	Accession	Short name	Incomplete	Superfamily
NtPAE1	specific	397399	36	386	0	554.152	pfam03283	PAE	-	cl03979
NtPAE2	specific	397399	100	393	2.32589e-142	409.317	pfam03283	PAE	-	cl03979
NtPAE3	specific	397399	26	378	0	551.841	pfam03283	PAE	-	cl03979
NtPAE4	specific	397399	48	400	0	560.316	pfam03283	PAE	-	cl03979
NtPAE5	specific	397399	62	410	0	651.223	pfam03283	PAE	-	cl03979
NtPAE6	specific	397399	39	361	4.62434e-170	478.268	pfam03283	PAE	-	cl03979
NtPAE7	specific	397399	58	426	0	641.207	pfam03283	PAE	-	cl03979
NtPAE8	specific	397399	66	398	0	604.999	pfam03283	PAE	-	cl03979
NtPAE9	specific	397399	30	379	2.21491e-173	487.898	pfam03283	PAE	-	cl03979
NtPAE10	specific	397399	1	302	0	514.477	pfam03283	PAE	-	cl03979
NtPAE11	specific	397399	19	340	1.63072e-157	447.837	pfam03283	PAE	-	cl03979
NtPAE12	specific	397399	25	338	1.31239e-176	494.061	pfam03283	PAE	-	cl03979
NtPAE13	specific	397399	27	377	0	673.564	pfam03283	PAE	-	cl03979
NtPAE14	specific	397399	58	410	0	568.79	pfam03283	PAE	-	cl03979
NtPAE15	specific	397399	54	404	0	647.756	pfam03283	PAE	-	cl03979
NtPAE16	specific	397399	24	375	0	650.837	pfam03283	PAE	-	cl03979
NtPAE17	specific	397399	33	340	2.32576e-144	412.399	pfam03283	PAE	-	cl03979
NtPAE18	superfamily	397399	1	249	9.04188e-88	264.868	cl03979	PAE superfamily	-	-
NtPAE19	specific	397399	31	369	0	516.018	pfam03283	PAE	-	cl03979
NtPAE20	specific	397399	6	361	0	544.908	pfam03283	PAE	-	cl03979
NtPAE21	specific	397399	27	377	0	671.638	pfam03283	PAE	-	cl03979
NtPAE22	specific	397399	30	367	8.8792e-173	485.972	pfam03283	PAE	-	cl03979
NtPAE23	specific	397399	27	377	0	557.619	pfam03283	PAE	-	cl03979
NtPAE24	specific	397399	29	384	0	591.132	pfam03283	PAE	-	cl03979
NtPAE25	specific	397399	19	373	0	553.382	pfam03283	PAE	-	cl03979
NtPAE26	specific	397399	29	399	0	509.469	pfam03283	PAE	-	cl03979
NtPAE27	specific	397399	5	280	4.63671e-166	464.786	pfam03283	PAE	-	cl03979
NtPAE28	specific	397399	9	378	0	533.737	pfam03283	PAE	-	cl03979
NtPAE29	specific	397399	28	410	0	511.395	pfam03283	PAE	-	cl03979
NtPAE30	specific	397399	6	343	0	539.9	pfam03283	PAE	-	cl03979

## Sheet: SignalP6 Output
# SignalP-6.0	Organism: Other	Timestamp: 20220824110756
# ID	Prediction	OTHER	SP(Sec/SPI)	LIPO(Sec/SPII)	TAT(Tat/SPI)	TATLIPO(Sec/SPII)	PILIN(Sec/SPIII)	CS Position
NtPAE1	SP	0.000158	0.999317	0.000135	0.000151	0.000119	0.000125	CS pos: 35-36. Pr: 0.9797
NtPAE2	NO_SP	1	0	0	0	0	0
NtPAE3	SP	0.000149	0.999347	0.000124	0.000148	0.00012	0.000118	CS pos: 23-24. Pr: 0.9841
NtPAE4	NO_SP	1.00002	0	0	0	0	0
NtPAE5	SP	0.410843	0.585593	0.000848	0.001057	0.000841	0.000827	CS pos: 34-35. Pr: 0.6392
NtPAE6	NO_SP	0.971871	0.028072	1.6e-05	1.2e-05	1.3e-05	1e-05
NtPAE7	SP	0.02831	0.967024	0.001241	0.001414	0.001088	0.000918	CS pos: 25-26. Pr: 0.9767
NtPAE8	NO_SP	0.833466	0.166245	9.3e-05	7.7e-05	7e-05	7.5e-05
NtPAE9	SP	0.000152	0.999372	0.000123	0.000142	0.000116	0.000117	CS pos: 23-24. Pr: 0.9858
NtPAE10	NO_SP	1.00002	0	0	0	0	0
NtPAE11	SP	0.000169	0.999258	0.000144	0.000167	0.000134	0.000132	CS pos: 17-18. Pr: 0.9829
NtPAE12	NO_SP	0.999977	1e-06	0	0	0	0
NtPAE13	SP	0.000158	0.999341	0.000129	0.000143	0.000117	0.000115	CS pos: 30-31. Pr: 0.7052
NtPAE14	NO_SP	0.999977	0	0	0	0	0
NtPAE15	SP	0.052004	0.935407	0.002297	0.005229	0.002185	0.002906	CS pos: 21-22. Pr: 0.9776
NtPAE16	SP	0.333632	0.665413	0.000246	0.000296	0.000203	0.000232	CS pos: 26-27. Pr: 0.6053
NtPAE17	SP	0.000158	0.999306	0.000132	0.000149	0.000123	0.000124	CS pos: 25-26. Pr: 0.9735
NtPAE18	NO_SP	1.00002	0	0	0	0	0
NtPAE19	NO_SP	0.999999	0	0	0	0	0
NtPAE20	NO_SP	0.833381	0.166535	3.1e-05	2.4e-05	2.2e-05	2.1e-05
NtPAE21	SP	0.000166	0.999346	0.000135	0.000144	0.000118	0.000116	CS pos: 30-31. Pr: 0.9596
NtPAE22	SP	0.000152	0.99935	0.000125	0.000145	0.000119	0.000119	CS pos: 23-24. Pr: 0.9858
NtPAE23	SP	0.000156	0.999326	0.000125	0.000155	0.000125	0.000121	CS pos: 23-24. Pr: 0.9838
NtPAE24	SP	0.000151	0.999334	0.000126	0.00015	0.00012	0.00012	CS pos: 23-24. Pr: 0.9842
NtPAE25	SP	0.00015	0.99931	0.000125	0.00015	0.000116	0.000118	CS pos: 20-21. Pr: 0.9861
NtPAE26	SP	0.000155	0.999365	0.000129	0.000143	0.000117	0.000117	CS pos: 29-30. Pr: 0.9808
NtPAE27	NO_SP	1.00002	0	0	0	0	0
NtPAE28	NO_SP	1.00002	0	0	0	0	0
NtPAE29	SP	0.177147	0.822173	0.000243	0.000179	0.000147	0.000156	CS pos: 31-32. Pr: 0.7779
NtPAE30	NO_SP	1.00002	0	0	0	0	0

## Sheet: DeepLoc2.0 Output
		Probability thresholds for the subcellular localizations. A localization is predicted if its probability is above the threshold shown below:
		Localization	Cytoplasm	Nucleus	Extracellular	Cell membrane	Mitochondrion	Plastid	Endoplasmic reticulum	Lysosome/Vacuole	Golgi apparatus	Peroxisome
		Threshold	0.4761	0.5014	0.6173	0.5646	0.622	0.6395	0.609	0.5848	0.6494	0.7364
		NOTE: Above-treshold cells are highlighted
Protein_ID	Localizations	Signals	Cytoplasm	Nucleus	Extracellular	Cell membrane	Mitochondrion	Plastid	Endoplasmic reticulum	Lysosome/Vacuole	Golgi apparatus	Peroxisome
NtPAE1	Extracellular	Signal peptide	0.1958	0.1064	0.7049	0.1562	0.0368	0.0455	0.4595	0.4062	0.2579	0.005
NtPAE2	Cytoplasm|Extracellular	Signal peptide	0.4965	0.2419	0.7274	0.1559	0.1296	0.1571	0.5013	0.2361	0.2115	0.1964
NtPAE3	Extracellular	Signal peptide	0.1855	0.0937	0.7034	0.2152	0.026	0.07	0.4972	0.4919	0.2626	0.0129
NtPAE4	Endoplasmic reticulum|Golgi apparatus	Signal peptide|Transmembrane domain	0.1506	0.114	0.2562	0.3469	0.046	0.0914	0.7441	0.5335	0.7053	0.0451
NtPAE5	Extracellular	Signal peptide	0.1374	0.1759	0.7823	0.2321	0.0754	0.18	0.399	0.5002	0.3171	0.0058
NtPAE6	Cytoplasm|Extracellular	Signal peptide	0.5421	0.2534	0.8363	0.0786	0.2	0.0523	0.4172	0.1048	0.179	0.022
NtPAE7	Extracellular	Signal peptide	0.1229	0.1431	0.7768	0.1891	0.0487	0.221	0.4986	0.4877	0.3071	0.0067
NtPAE8	Extracellular	Signal peptide	0.1596	0.2363	0.6753	0.2043	0.0774	0.153	0.4644	0.547	0.3599	0.0063
NtPAE9	Extracellular	Signal peptide	0.1217	0.0963	0.8085	0.1684	0.0399	0.2069	0.3523	0.4574	0.2611	0.0045
NtPAE10	Extracellular	Signal peptide	0.4521	0.1815	0.7236	0.172	0.1215	0.1003	0.2936	0.2035	0.1821	0.1621
NtPAE11	Extracellular|Lysosome/Vacuole	Signal peptide	0.1766	0.0636	0.6809	0.2267	0.034	0.0207	0.5062	0.5979	0.2171	0.0068
NtPAE12	Extracellular		0.3985	0.3326	0.6509	0.1238	0.162	0.1662	0.1176	0.0973	0.0853	0.3524
NtPAE13	Extracellular	Signal peptide	0.155	0.1151	0.8303	0.2339	0.0662	0.0388	0.3703	0.3042	0.2081	0.0066
NtPAE14	Endoplasmic reticulum|Golgi apparatus	Signal peptide|Transmembrane domain	0.1676	0.1329	0.2693	0.3605	0.045	0.1093	0.7147	0.5202	0.6912	0.0461
NtPAE15	Extracellular	Signal peptide	0.1375	0.1284	0.7875	0.2414	0.048	0.22	0.4446	0.5617	0.3156	0.0043
NtPAE16	Extracellular	Signal peptide	0.1084	0.0904	0.811	0.2389	0.0398	0.137	0.3587	0.3835	0.2027	0.0119
NtPAE17	Extracellular	Signal peptide	0.1755	0.1063	0.6033	0.1631	0.0334	0.0912	0.3939	0.475	0.2245	0.0027
NtPAE18	Cytoplasm		0.582	0.2411	0.5106	0.0997	0.1088	0.1327	0.5069	0.2183	0.3069	0.0645
NtPAE19	Cytoplasm|Extracellular	Signal peptide	0.5322	0.1806	0.7759	0.0845	0.1605	0.0306	0.4623	0.1478	0.1864	0.0396
NtPAE20	Extracellular	Signal peptide	0.1478	0.1188	0.7612	0.1594	0.0625	0.0393	0.4156	0.268	0.1252	0.0119
NtPAE21	Extracellular	Signal peptide	0.15	0.1102	0.8072	0.2351	0.0466	0.0573	0.3899	0.3088	0.2131	0.0062
NtPAE22	Extracellular	Signal peptide	0.1031	0.095	0.7953	0.1913	0.0342	0.1665	0.3164	0.3904	0.2018	0.0026
NtPAE23	Extracellular	Signal peptide	0.1785	0.1155	0.7088	0.1972	0.0269	0.2043	0.3713	0.5343	0.1766	0.0042
NtPAE24	Extracellular	Signal peptide	0.1707	0.1037	0.6816	0.2185	0.0244	0.0635	0.5299	0.5245	0.2512	0.0078
NtPAE25	Extracellular|Lysosome/Vacuole	Signal peptide	0.1659	0.0905	0.6844	0.2201	0.0175	0.1816	0.5141	0.5991	0.1792	0.0106
NtPAE26	Extracellular	Signal peptide	0.1724	0.1188	0.7142	0.2026	0.0229	0.1154	0.4269	0.5052	0.2088	0.0075
NtPAE27	Cytoplasm		0.5965	0.2149	0.5384	0.1461	0.0941	0.0879	0.303	0.1454	0.1133	0.1236
NtPAE28	Extracellular	Signal peptide	0.2144	0.1407	0.7754	0.1073	0.058	0.0809	0.4792	0.3496	0.1737	0.007
NtPAE29	Extracellular	Signal peptide	0.1723	0.1104	0.716	0.229	0.0265	0.1084	0.4705	0.5753	0.3006	0.0051
NtPAE30	Extracellular	Signal peptide	0.4334	0.2271	0.7333	0.182	0.0954	0.1335	0.4986	0.2049	0.1327	0.0934
