# Supplementary material for: Silencing of a Pectin Acetylesterase (PAE) Gene Highly Expressed in Tobacco Pistils Negatively Affects Pollen Tube Growth
Source: Plants (Basel). 2023 Jan 10;12(2):329. doi: 10.3390/plants12020329 (PMC9864977; doi:10.3390/plants12020329)
Supplement: Supplementary file 1 [file plants-12-00329-s001.zip › Table S3 - PAE family expression data.xlsx]

## Sheet: Arabidopsis thaliana
Arabidopsis thaliana Original Data - RNA-seq from Klepikova et al., 2016 retrieved from travadb.org
		Expression							Standard Deviations
		Young Leaves		Mature Leaves	Seedling Root		Flower		Young Leaves		Mature Leaves	Seedling Root		Flower
Gene	Accession	Leaf Lamina of the young leaf	Leaf Petiole of the young leaf	Leaf, mature	Root Apex	Root without apex	Flower 1		Leaf Lamina of the young leaf sd	Leaf Petiole of the young leaf sd	Leaf, mature sd	Root Apex sd	Root without apex sd	Flower 1 sd
AtPAE10	AT5G26670	5.77	4.8	0.52	4.09	13.53	4.83		0.43	0.16	0.32	0.37	1.13	0.35
AtPAE1	AT1G09550	0.01	0	0	0.01	0.02	0.04		0.01	0	0	0.01	0.01	0.01
AtPAE3	AT2G46930	6.81	9.07	3.05	8.44	8.42	8.23		0.72	0.36	0.35	0.92	0.06	0.4
AtPAE12	AT3G05910	16.35	17.31	8.19	26.54	25.9	12.02		0.42	1.04	0.08	1.21	0.78	0.46
AtPAE5	AT3G09410	4.31	6.63	12.75	9.86	11	4.8		0.4	0.56	0.24	0.21	0.06	0.16
AtPAE6	AT3G62060	9.38	10.67	0.72	3.17	3.48	4.68		0.72	0.28	0.02	0.32	0	0.6
AtPAE7	AT4G19410	23.36	28.6	27.08	61.07	32.63	22.13		0.67	0.42	1.22	4.53	0.31	1.55
AtPAE8	AT4G19420	3.54	1.01	51.29	5.11	5.87	31.29		0.23	0.17	0.87	0.49	0.55	1.63
AtPAE11	AT5G45280	2.76	2.83	2.97	62.95	20.19	5.58		0.16	0.07	0.45	8.1	0.34	0.24
AtPAE9	AT5G23870	1.32	1.33	6.28	2.69	2.14	2.75		0.13	0.16	0.04	0.26	0.08	0.13
AtPAE2	AT1G57590	0	0	9.46	20.24	9.73	6.04		0	0	0.89	3.99	0.65	0.16
AtPAE4	AT3G09405	0.15	0.29	1.24	0.36	1.03	0.19		0	0.01	0.14	0.05	0.31	0.06
Arabidopsis thaliana Transformed Data
		Expression								Z-scores
Gene	Accession	Seedling Root	Young Leaves	Mature Leaves	Flower		Average	Standard Deviation		Gene	Seedling Root	Young Leaves	Mature Leaves	Flower
AtPAE10	AT5G26670	17.62	10.57	0.52	4.83		8.385	7.40621		AtPAE10	1.24693	0.295023	-1.06195	-0.480003
AtPAE1	AT1G09550	0.03	0.01	0	0.04		0.02	0.0182574		AtPAE1	0.547723	-0.547723	-1.09545	1.09545
AtPAE3	AT2G46930	16.86	15.88	3.05	8.23		11.005	6.55818		AtPAE3	0.892778	0.743346	-1.21299	-0.423135
AtPAE12	AT3G05910	52.44	33.66	8.19	12.02		26.5775	20.5674		AtPAE12	1.25745	0.344356	-0.894013	-0.707795
AtPAE5	AT3G09410	20.86	10.94	12.75	4.8		12.3375	6.62244		AtPAE5	1.28691	-0.211025	0.0622882	-1.13818
AtPAE6	AT3G62060	6.65	20.05	0.72	4.68		8.025	8.38736		AtPAE6	-0.163937	1.43371	-0.870954	-0.398815
AtPAE7	AT4G19410	93.7	51.96	27.08	22.13		48.7175	32.7058		AtPAE7	1.37537	0.0991413	-0.661579	-0.812928
AtPAE8	AT4G19420	10.98	4.55	51.29	31.29		24.5275	21.1707		AtPAE8	-0.639917	-0.943638	1.26413	0.319427
AtPAE11	AT5G45280	83.14	5.59	2.97	5.58		24.32	39.2327		AtPAE11	1.49926	-0.477408	-0.544189	-0.477663
AtPAE9	AT5G23870	4.83	2.65	6.28	2.75		4.1275	1.75188		AtPAE9	0.400997	-0.843379	1.22868	-0.786297
AtPAE2	AT1G57590	29.97	0	9.46	6.04		11.3675	13.0038		AtPAE2	1.43055	-0.87417	-0.146688	-0.409689
AtPAE4	AT3G09405	1.39	0.44	1.24	0.19		0.815	0.589491		AtPAE4	0.975417	-0.636142	0.720961	-1.06024

## Sheet: Populus trichocarpa
Populus trichocarpa - Microarray (bar.utoronto.ca/eplant_poplar)
		Expression							Standard Deviations									Z-scores
Gene	Accession	Roots	Young Leaves	Mature Leaves	Male Flower	Female Flower	Flower Average		Roots	Young Leaves	Mature Leaves	Male Flower	Female Flower		Average	Standard Deviation		Gene	Roots	Young Leaves	Mature Leaves	Flowers
PtPAE1	Potri.003G046200	2709.6	10947.2	2093.62	16875.7	18001.8	17438.8		514.24	7449.11	994.33	2822.42	4531.2		8297.3	7309.73		PtPAE1	-0.764419	0.362517	-0.848687	1.17356
PtPAE2	Potri.004G233900	1258.93	948.57	738.92	1725.93	2592.23	2159.08		744.45	620.65	245.99	470.1	768.21		1276.38	626.042		PtPAE2	-0.0278655	-0.523615	-0.858496	0.718091
PtPAE3	Potri.004G234100	1182.87	145.27	200.04	492.23	414.43	453.33		285.99	21.31	89.64	58.4	121.16		495.377	477.568		PtPAE3	1.43957	-0.733105	-0.61842	-0.00659069
PtPAE4	Potri.005G001500	183.7	1051.87	1561.81	153.83	176.4	165.115		14.63	924.93	134.37	132.49	141.61		740.624	686.196		PtPAE4	-0.81161	0.453582	1.19672	-0.85514
PtPAE5	Potri.006G084900	924.2	991.2	91.41	251.47	279.53	265.5		112.96	63.91	15.72	42.37	45.14		568.077	456.297		PtPAE5	0.780462	0.927296	-1.04464	-0.693863
PtPAE6	Potri.010G004400	212.23	300	73.71	202.2	30.4	116.3		153.9	100.07	35.46	165.64	23.59		175.56	101.185		PtPAE6	0.362406	1.22983	-1.00657	0.26328
PtPAE7	Potri.012G142300	68.63	24.7	3.41	164.8	33.97	99.385		23.49	26.47	1.93	174.66	22.52		49.0312	43.1776		PtPAE7	0.45391	-0.563515	-1.05659	2.68122
PtPAE8	Potri.013G000900	410.5	313.07	80.06	1440.03	1139.73	1289.88		133.43	90.98	41.43	592.82	235.08		523.378	529.474		PtPAE8	-0.213188	-0.397201	-0.83728	1.73125
PtPAE9	Potri.014G110900	133.07	270.1	47.26	155.77	57.8	106.785		49.2	28.77	10.72	219.32	44.02		139.304	94.2975		PtPAE9	-0.0661073	1.38706	-0.9761	0.17462
PtPAE10	Potri.015G145400	36.47	78.43	107.91	196.87	75.6	136.235		21.22	39.88	38.43	167.96	48.34		89.7613	42.6519		PtPAE10	-1.24945	-0.265668	0.425509	2.51123

## Sheet: Phaseolus vulgaris
Phaseolus vulgaris - data from O'Rourke et al., 2014 retrieve from zhaolab.org/PvGEA
		Expression								Z-scores
Gene	Accession	Roots	Young Leaves	Mature Leaves	Flowers		Average	Standard Deviation		Gene	Roots	Young Leaves	Mature Leaves	Flowers
PvPAE8	Phvul.003G277600	1.1	11.3	1.1	1.8		3.825	4.99425		PvPAE8	-0.545628	1.49672	-0.545628	-0.405467

## Sheet: Nicotiana tabacum
Nicotiana tabacum - RNA-seq (sources described on the right)																					RNA-seq libraries used
		Expression					Standard Deviation								Z-scores						SRA Accession	Tissue
Gene	Accession	Roots	Young Leaves	Mature Leaves	Flowers		Roots sd	Young Leaves sd	Mature Leaves sd	Flowers sd		Average	Standard Deviation		Gene	Roots	Young Leaves	Mature Leaves	Flowers		ERR6407644	Root
NtPAE2	Nitab4.5_0002799g0050	0	0.363526	0	2.24745		0	0.316319	0	0.959246		0.652745	1.07686		NtPAE2	-0.606155	-0.268575	-0.606155	1.48088		ERR6407786	Root
NtPAE3	Nitab4.5_0001842g0130	2.89723	1.15962	0.627693	3.79032		0.879803	0.362995	0.147353	1.06845		2.11872	1.47686		NtPAE3	0.52714	-0.649414	-1.00959	1.13186		ERR6407793	Root
NtPAE4	Nitab4.5_0000349g0240	15.6034	8.27154	8.42136	11.8778		3.47732	0.34699	1.06965	2.12197		11.0435	3.4664		NtPAE4	1.31545	-0.799668	-0.756447	0.24067		ERR6407829	Root
NtPAE5	Nitab4.5_0000541g0090	19.9119	42.3512	17.8932	31.4538		3.70722	36.7057	2.80237	1.58862		27.9025	11.3345		NtPAE5	-0.704981	1.27475	-0.883087	0.313316		ERR6407934	Root
NtPAE6	Nitab4.5_0002660g0050	0.27082	0.729545	1.03261	14.022		0.408033	0.338024	0.770361	2.29232		4.01375	6.67952		NtPAE6	0	0	0	1.49835		ERR6407938	Root
NtPAE7	Nitab4.5_0000081g0180	11.0715	29.1686	12.816	63.4741		1.65356	3.82036	2.30567	3.18241		29.1325	24.3021		NtPAE7	-0.74319	0.00148243	-0.671404	1.41311		SRR1199121	Root
NtPAE8	Nitab4.5_0003511g0020	10.0666	5.48969	5.36395	65.5678		1.92657	1.43088	2.17943	2.54395		21.622	29.3788		NtPAE8	-0.393326	-0.549115	-0.553395	1.49584		SRR1199122	Root
NtPAE9	Nitab4.5_0000285g0040	0.141361	0.203103	0.496729	4.49507		0.2781	0.100181	0.350102	0.905523		1.33407	2.11303		NtPAE9	-0.564452	-0.535233	-0.396273	1.49596		SRR1199123	Root
NtPAE10	Nitab4.5_0000623g0070	0.0226458	0	0	2.7561		0.0640519	0	0	0.79556		0.694686	1.37432		NtPAE10	-0.489	-0.505478	-0.505478	1.49995		SRR1199203	Young_Leaf
NtPAE11	Nitab4.5_0000623g0110	0.0529292	0.0867796	0.149807	10.5366		0.149706	0.150307	0.132025	1.40268		2.70654	5.22022		NtPAE11	-0.508333	-0.501848	-0.489775	1.49996		SRR1199202	Young_Leaf
NtPAE12	Nitab4.5_0000063g0270	0	0	0	16.1356		0	0	0	3.21942		4.03389	8.06778		NtPAE12	-0.5	-0.5	-0.5	1.5		SRR1199200	Young_Leaf
NtPAE1	Nitab4.5_0000063g0300	0.00613454	0	0	60.1673		0.0173511	0	0	10.0616		15.0434	30.0826		NtPAE1	-0.499864	-0.500068	-0.500068	1.5		SRR1199072	Mature_Leaf
NtPAE13	Nitab4.5_0000063g0340	239.281	335.339	166.657	176.672		296.779	220.236	77.4634	4.27019		229.487	77.5407		NtPAE13	0.126308	1.36511	-0.810289	-0.681133		SRR1199073	Mature_Leaf
NtPAE14	Nitab4.5_0001911g0040	18.6736	9.63661	9.9797	13.8283		4.96634	1.23066	1.43465	1.23712		13.0295	4.21533		NtPAE14	1.33894	-0.804904	-0.723513	0.189478		SRR1199074	Mature_Leaf
NtPAE15	Nitab4.5_0001081g0010	11.2991	34.1333	20.9719	56.8561		4.20761	0.336169	5.55808	4.42042		30.8151	19.7223		NtPAE15	-0.989539	0.168244	-0.499089	1.32038		ERR6407650	Flower
NtPAE16	Nitab4.5_0001132g0010	6.37587	8.94489	7.67617	49.0692		3.11021	3.64559	3.20339	3.33487		18.0165	20.7283		NtPAE16	-0.561582	-0.437645	-0.498852	1.49808		ERR6407789	Flower
NtPAE17	Nitab4.5_0001289g0100	0.345709	0.446228	1.05736	22.9878		0.374812	0.418691	0.804661	3.10989		6.20929	11.1901		NtPAE17	-0.523996	-0.515013	-0.460399	1.49941		ERR6407797	Flower
NtPAE18	Nitab4.5_0001351g0060	0	0	0	0		0	0	0	0		0	0		NtPAE18	-1.4357	-1.4357	-1.4357	-1.4357		ERR6407833	Flower
NtPAE19	Nitab4.5_0002697g0010	0	0	0	1.41078		0	0	0	0.779379		0.352694	0.705388		NtPAE19	-0.5	-0.5	-0.5	1.5		ERR6411309	Flower
NtPAE20	Nitab4.5_0002697g0050	0	0	0	3.06552		0	0	0	0.77787		0.76638	1.53276		NtPAE20	-0.5	-0.5	-0.5	1.5		ERR6411311	Flower
NtPAE21	Nitab4.5_0002697g0070	232.132	170.505	84.5066	73.123		343.091	127.104	35.6875	9.3365		140.067	75.2126		NtPAE21	1.22407	0.404694	-0.738704	-0.890056
NtPAE22	Nitab4.5_0002913g0030	0.133894	0.0982534	0.614928	2.07377		0.248047	0.17018	0.341538	1.40098		0.730212	0.926177		NtPAE22	-0.643849	-0.68233	-0.124472	1.45065
NtPAE23	Nitab4.5_0003422g0020	0.130903	0	0.0736116	134.17		0.211506	0	0.127499	16.8991		33.5936	67.0509		NtPAE23	-0.499064	-0.501017	-0.499919	1.5
NtPAE24	Nitab4.5_0005845g0030	3.25752	2.59911	1.03925	2.77646		1.72558	0.534749	0.127685	0.644465		2.41809	0.960387		NtPAE24	0.87406	0.188488	-1.4357	0.373155
NtPAE25	Nitab4.5_0006127g0010	0	0	0.0110525	0.52144		0	0	0.0191436	0.44806		0.133123	0.25893		NtPAE25	-0.514127	-0.514127	-0.471442	1.4997
NtPAE26	Nitab4.5_0006546g0010	0.0176317	0	0	7.34837		0.0498699	0	0	1.87968		1.8415	3.67126		NtPAE26	-0.496797	-0.5016	-0.5016	1.5
NtPAE27	Nitab4.5_0007008g0030	0	0	0	0.525887		0	0	0	0.443693		0.131472	0.262944		NtPAE27	-0.5	-0.5	-0.5	1.5
NtPAE28	Nitab4.5_0008163g0010	0	0	0	8.15094		0	0	0	2.69346		2.03774	4.07547		NtPAE28	-0.5	-0.5	-0.5	1.5
NtPAE29	Nitab4.5_0014203g0010	0	0	0	0		0	0	0	0		0	0		NtPAE29	-1.4357	-1.4357	-1.4357	-1.4357
NtPAE30	Nitab4.5_0027059g0010	0	0.11005	0	37.7938		0	0.0954496	0	6.74237		9.47595	18.8786		NtPAE30	-0.501941	-0.496112	-0.501941	1.49999
																Minimum Value	-1.4357
																																				ERR6411982	Sepal
																																				SRR1199203	Young_Leaf
																																				SRR1199202	Young_Leaf
																																				SRR1199200	Young_Leaf
																																				Brito et al., 2018	Stigma_Style
																																				Brito et al., 2018	Stigma_Style
																																				Brito et al., 2018	Stigma_Style

## Sheet: Solanum lycopersicum
Solanum lycopersicum - RNA-seq from Sato et al., 2012 retrieved from ePlant-Tomato (bar.utoronto.ca/eplant_tomato)
		Expression							Z-scores
Gene	Accession	Root	Leaf	Flower		Average	Standard Deviation		Gene	Root	Young Leaves	Mature Leaves	Flower
SlPAE1	Solyc01g102350	0	0.0013	0		0.000433333	0.000750555		SlPAE1	-0.57735	NA	1.1547	-0.57735
SlPAE2	Solyc03g025600	0.1905	0.3638	0.1107		0.221667	0.129396		SlPAE2	-0.240862	NA	1.09843	-0.857572
SlPAE3	Solyc03g078260	0.0135	0.003	5.1716		1.72937	2.98107		SlPAE3	-0.575588	NA	-0.57911	1.1547
SlPAE4	Solyc08g005790	0.0468	0.0037	0.0125		0.021	0.0227726		SlPAE4	1.13294	NA	-0.759686	-0.373256
SlPAE5	Solyc08g005800	1.0197	1.4094	0.3065		0.911867	0.559301		SlPAE5	0.1928	NA	0.889562	-1.08236
SlPAE6	Solyc08g014380	0.0003	0.0071	0.0251		0.0108333	0.0128146		SlPAE6	-0.821981	NA	-0.291335	1.11332
SlPAE7	Solyc08g074950	0.0003	0	0.0023		0.000866667	0.00125033		SlPAE7	-0.453212	NA	-0.693149	1.14636
SlPAE8	Solyc08g074990	0	0	0.0322		0.0107333	0.0185907		SlPAE8	-0.57735	NA	-0.57735	1.1547
SlPAE9	Solyc08g075020	0.042	0.236	0.8586		0.378867	0.426635		SlPAE9	-0.789591	NA	-0.334869	1.12446
SlPAE10	Solyc08g075030	0.0006	0.0003	0.4791		0.16	0.276349		SlPAE10	-0.576807	NA	-0.577893	1.1547
SlPAE11	Solyc08g075050	0	0	0.0004		0.000133333	0.00023094		SlPAE11	-0.57735	NA	-0.57735	1.1547
SlPAE12	Solyc08g075060	0.0034	0.016	0.0044		0.00793333	0.00700381		SlPAE12	-0.647267	NA	1.15175	-0.504487
SlPAE13	Solyc10g038130	0.1841	0.3201	0.4171		0.3071	0.117043		SlPAE13	-1.0509	NA	0.111071	0.939828
SlPAE14	Solyc10g050750	0	0	0		0	0		SlPAE14	-1.08236	NA	-1.08236	-1.08236
SlPAE15	Solyc10g086480	0.0754	0.1022	0.0342		0.0706	0.0342532		SlPAE15	0.140133	NA	0.922542	-1.06268
SlPAE16	Solyc12g019440	0.0174	0.0004	0		0.00593333	0.00993244		SlPAE16	1.15447	NA	-0.557097	-0.597369
